# Supplementary material for: Exopolysaccharides of Lactobacillus crispatus mediate key balancing interactions with the vaginal mucosa
Source: Springer Nature journal article supplement (doi:10.1038/s41522-026-00937-5), 2026-02-19
Supplement: MOESM1 [file 41522_2026_937_MOESM1_ESM.pdf]

## Supplementary Information

### Exopolysaccharides of *Lactobacillus crispatus* mediate key balancing interactions with the vaginal mucosa

Vanessa Croatti<sup>1,2</sup>, Caroline Dricot<sup>1</sup>, Tom Eilers<sup>1</sup>, Jelle Dillen<sup>1</sup>, Tim Van Rillaer<sup>1</sup>, Eline Cauwenberghs<sup>1</sup>, Ilke Van Tente<sup>1</sup>, Sam Bakelants<sup>1</sup>, Dieter Vandenneuvel<sup>1</sup>, Camille Allonsius<sup>1</sup>, Isabel Pintelon<sup>3,4</sup>, Sofie Thys<sup>3,4</sup>, Wendy Mensah<sup>5</sup>, Marina Naldi<sup>5</sup>, Peter A. Bron<sup>1</sup>, Stijn Wittouck<sup>1</sup>, Irina Spacova<sup>1</sup>, Carola Parolin<sup>2</sup>, Beatrice Vitali<sup>2</sup>, Sarah Lebeer<sup>1\*</sup>

1 – Laboratory of Applied Microbiology and Biotechnology (LAMB), Department of Bioscience Engineering, University of Antwerp, Antwerp, Belgium.

2 – Beneficial Microbes Laboratory, Department of Pharmacy and Biotechnology, University of Bologna, Bologna, Italy

3 – Laboratory of Cell Biology and Histology, Faculty of Pharmaceutical, Biomedical and Veterinary Sciences, University of Antwerp, Wilrijk, Belgium

4 – Antwerp Centre for Advanced Microscopy (ACAM), University of Antwerp, Wilrijk, Belgium

5 – Bio-Pharmaceutical and Pharmaceutical Analysis, Department of Pharmacy and Biotechnology, University of Bologna, Bologna, Italy

\* corresponding author: sarah.lebeer@uantwerpen.be

**Table S1**

| <i>Species tested</i>                | <i>Strains</i> | <i>Growth in MRS media (OD<sub>600</sub>) Cut-off 1.5</i> | <i>Growth in MRS+glycine2%+sucrose2% (OD<sub>600</sub>) Cut-off 1</i> | <i>Chloramphenicol MIC (µg/mL) Cut-off 10 µg/mL</i> |
|--------------------------------------|----------------|-----------------------------------------------------------|-----------------------------------------------------------------------|-----------------------------------------------------|
| <i>Lactobacillus crispatus</i>       | BC1            | 5.33 ± 1.01                                               | 1.53 ± 0.02                                                           | 5                                                   |
|                                      | BC3            | 1.67 ± 0.12                                               | 1.25 ± 0.10                                                           | 5                                                   |
|                                      | BC5            | 5.10 ± 0.52                                               | 1.64 ± 0.04                                                           | 5                                                   |
|                                      | AMBV-0006      | 4.31 ± 1.14                                               | 1.28 ± 0.11                                                           | 5                                                   |
|                                      | AMBV-0815      | 3.26 ± 0.09                                               | 1.64 ± 0.05                                                           | 5                                                   |
|                                      | AMBV-1513      | 2.42 ± 0.67                                               | 1.14 ± 0.02                                                           | 5                                                   |
|                                      | AMBV-2491      | 2.03 ± 0.88                                               | 1.44 ± 0.20                                                           | 2.5                                                 |
| <i>Lactiplantibacillus plantarum</i> | WCFS1          | 3.04 ± 0.32                                               | 1.50 ± 0.05                                                           | 10                                                  |

**Table S1. Selection of in-house *L. crispatus* strains suitable for genetic manipulation. Data are reported as mean ± SD (n=2). *L. plantarum* WCFS1 was used as a control strain for electrocompetent cells preparation due to its high genetic accessibility using glycine-sucrose-based protocols.**

**Figure S1**

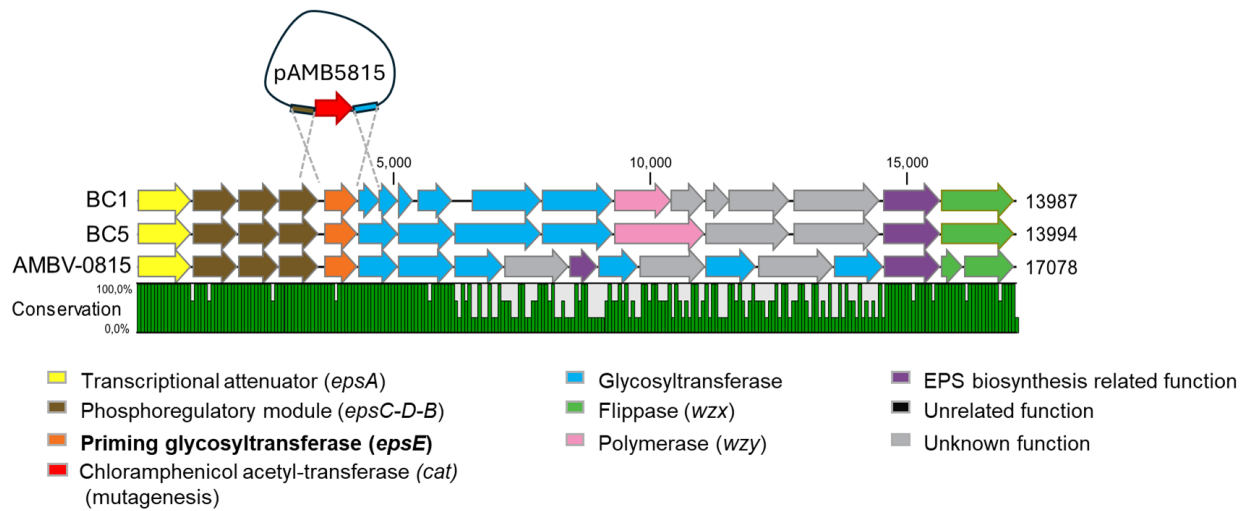

**Figure S1. Schematic representation of the EPS gene cluster in *L. crispatus* strains with highly conserved *epsE* neighboring genes and the construction of the semi-generic mutagenesis plasmid (pAMB5815). Nucleotide sequence conservation between the strains is reported in the line plot (%).**

**Table S2**

| Species tested                       | Strains   | Transformation efficiency (CFU/ $\mu$ g pNZ123) | Mutagenesis efficiency (pAMB5815) (CFU) |
|--------------------------------------|-----------|-------------------------------------------------|-----------------------------------------|
| <i>Lactobacillus crispatus</i>       | BC1       | $<10^3$                                         | 0                                       |
|                                      | BC5       | $<10^3$                                         | 0                                       |
|                                      | AMBV-0815 | $1.5 \times 10^4$                               | 1                                       |
| <i>Lactiplantibacillus plantarum</i> | WCFS1     | $8.4 \times 10^3$                               | /                                       |

**Table S2. Genetic accessibility of selected strains (pNZ123) and mutagenesis efficiency (pAMB5815). *L. plantarum* WCFS1 was used as a control strain for electrocompetent cells preparation due to its high genetic accessibility using glycine-sucrose-based protocols.**

**Figure S2**

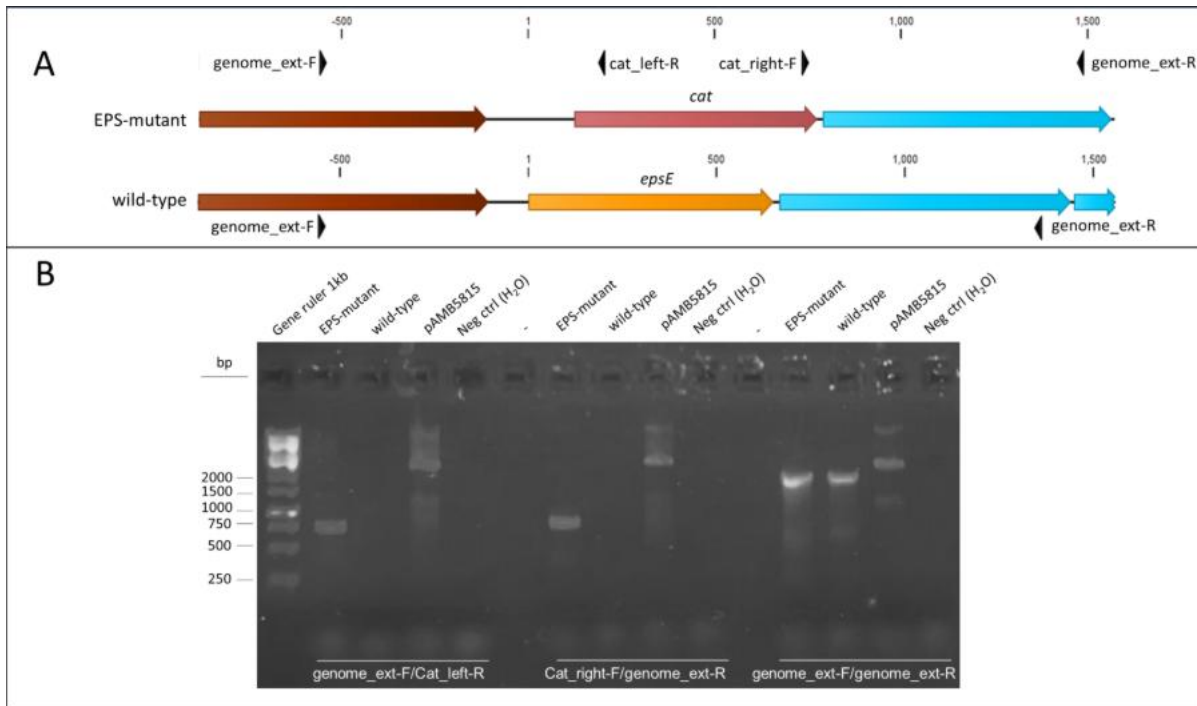

**Figure S2. A. Schematic representation of the primers used to check the double homologous recombination in *L. crispatus* AMBV-0815  $\Delta$ epsE (EPS-mutant). B. Gel electrophoresis (agarose 1% w/v) from colony PCR. All samples were amplified with PCR using three different primer pairs, indicated in white. EPS-mutant and wild-type genome was obtained from colony PCR. Mutagenesis plasmid pAMB5815 and H<sub>2</sub>O were used as negative controls. Nucleotides position is reported starting from the start codon (ATG) of epsE gene in the wild-type strain. Fragments expected in EPS-mutant strain: genome\_ext-F/Cat\_left-R: 766 bp; Cat\_right-F/genome\_ext-R: 756 bp and genome\_ext-F/genome\_ext-R: 2048 bp. Fragments expected in wild-type strain: genome\_ext-F/Cat\_left-R: / ; Cat\_right-F/genome\_ext-R: / and genome\_ext-F/genome\_ext-R: 1920 bp. PCR amplicons obtained for EPS-mutant were Sanger sequenced.**

Figure S3

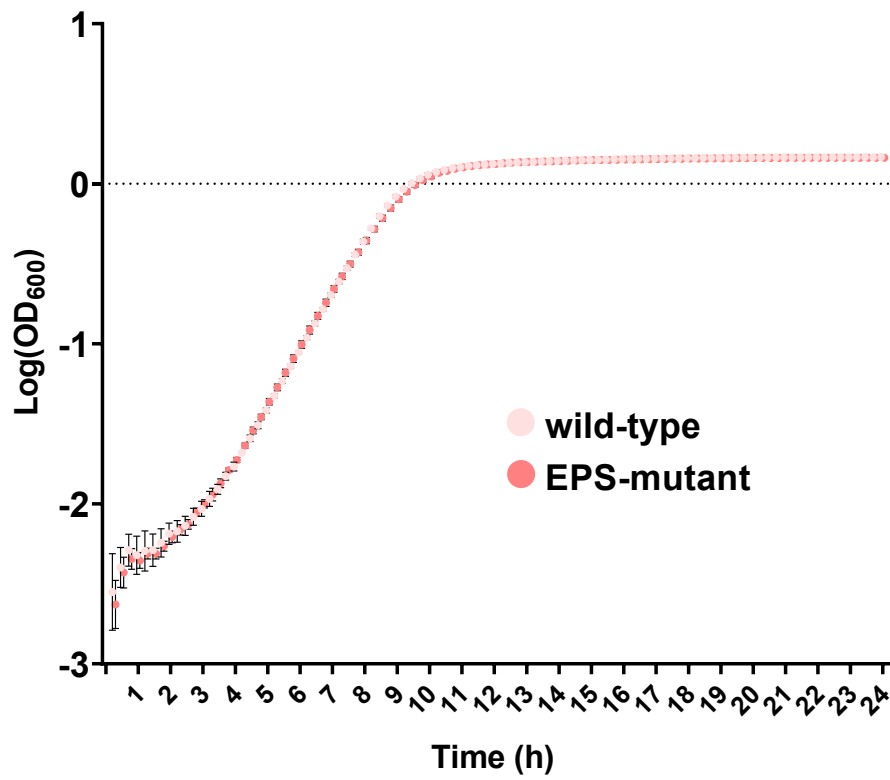

Figure S3. Growth curve in MRS liquid of *L. crispatus* AMBV-0815 wild-type and EPS-mutant (24 h). Data are reported as mean  $\pm$  SD ( $n = 3$ ).

**Figure S4**

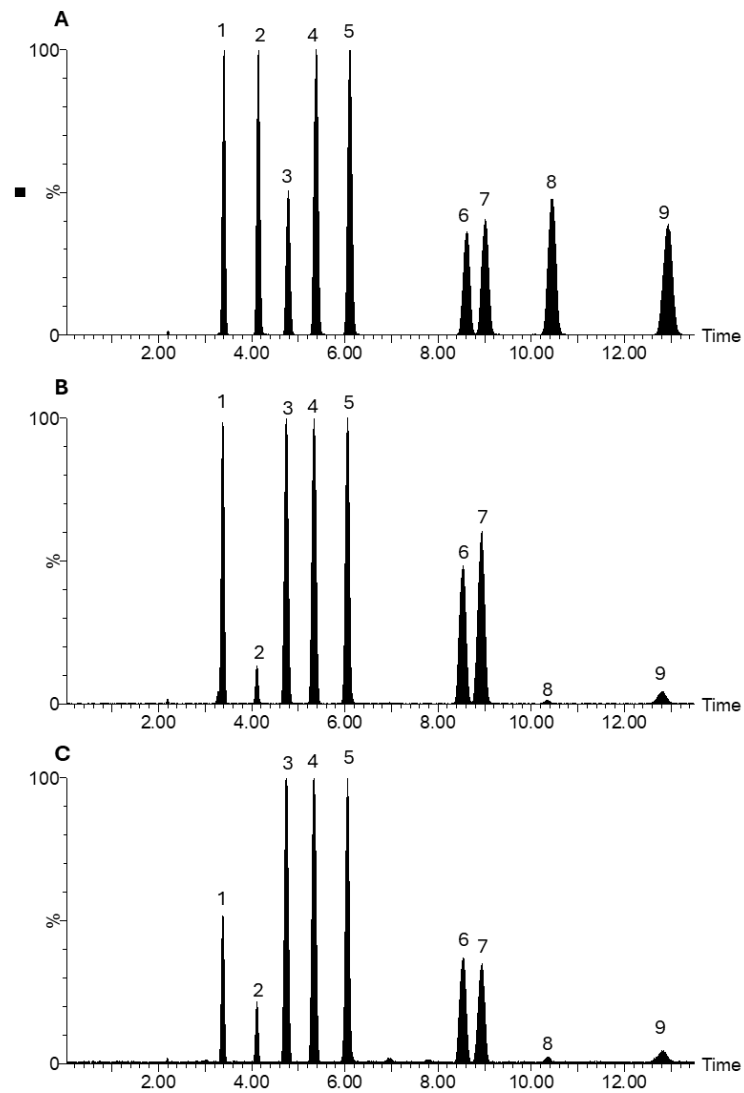

**Figure S4. Extract Ion Chromatograms of identified PMP-monosaccharides (LC-MS).** (A) mixture of nine standard PMP-monosaccharides; (B) PMP-monosaccharides from *L. crispatus* AMBV-0815; (C) EPS-mutant samples. Peaks: 1: D-glucosamine; 2: D-mannose; 3: galactosamine; 4: D-ribose; 5: D-rhamnose; 6: D-glucose; 7: D-galactose; 8: D-xylose; 9: D-fucose.

**Figure S5**

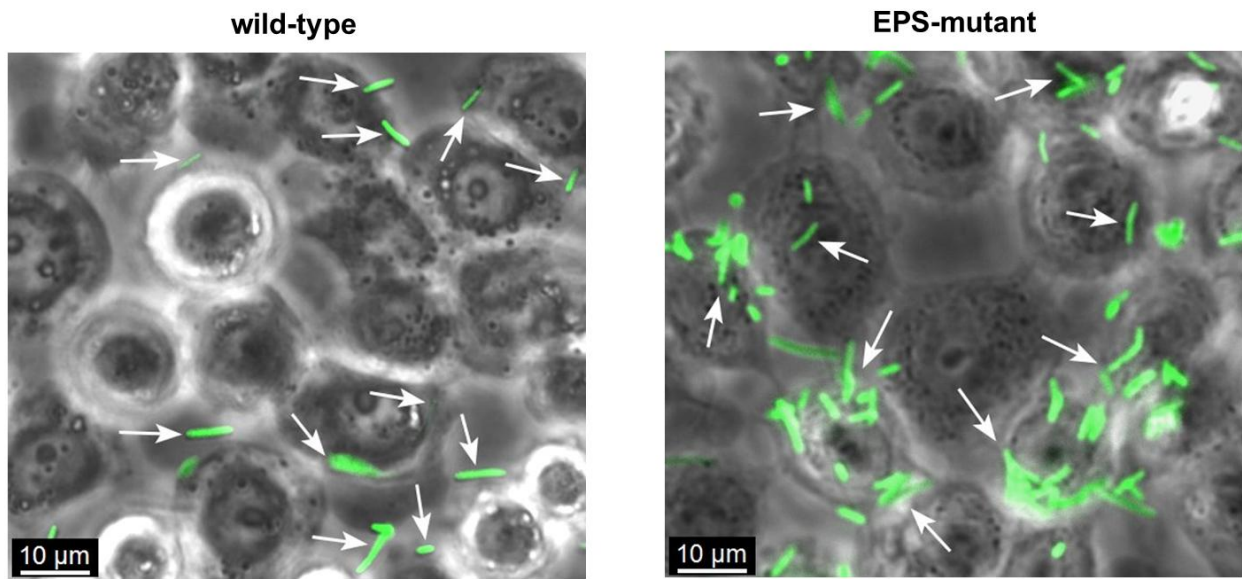

**Figure S5.** Fluorescence microscopy micrographs of *L. crispatus* AMBV-0815 wild-type and EPS-mutant adherent on vaginal epithelium cells monolayer (VK2/E6E7) (3h). *L. crispatus* AMBV-0815 wild-type and EPS-mutant were fluorescence stained with FITC (0.1 μg/mL - green channel, indicated with white arrows).

**Figure S6**

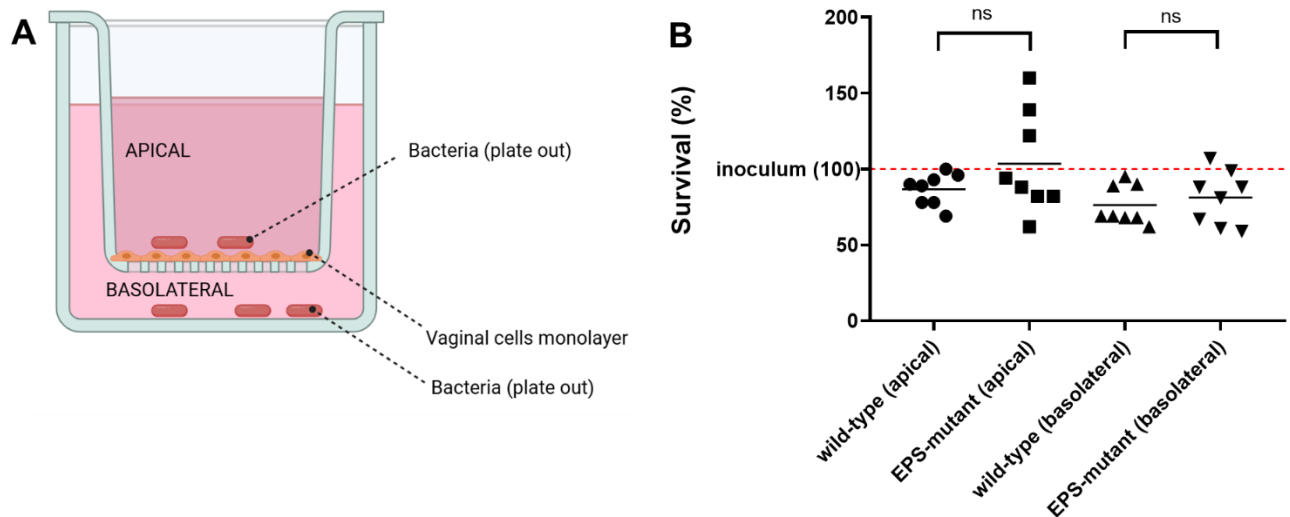

**Figure S6.** Survival of bacterial cells in presence of vaginal cells on apical side (direct contact) and on basolateral side (indirect contact) of a transwell model (3h). (A) Schematic representation of the assay. (B) Survival rates (%) of *L. crispatus* AMBV-0815 wild-type and EPS-mutant. The survival was calculated basing on the CFU plated out after 3h exposure in respect to the starting inoculum (CFU before exposure –100% survival). Two-way ANOVA with Tukey correction ( $n=8$ , ns =non significance,  $p > 0.05$ )

**Figure S7**

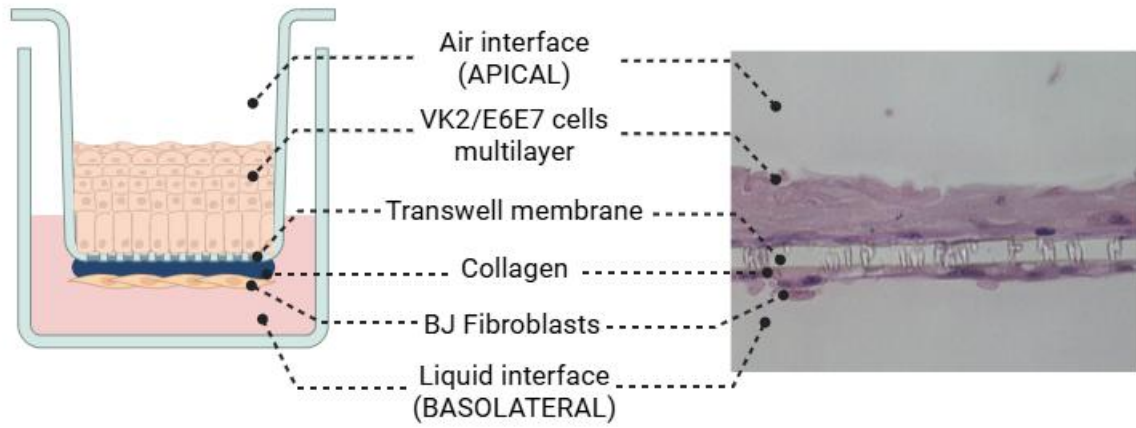

**Figure S7. Representation and micrograph of cross section of the 3D vaginal transwell model (hematoxylin and eosin stained) used in the present study.**
